# Supplementary material for: Obesity causes selective and long-lasting desensitization of AgRP neurons to dietary fat
Source: eLife journal article supplement (doi:10.7554/elife.55909), 2020-07-27
Supplement: supp [file elife-55909-supp-v1.zip]

Archive with 5 entries (5 files):
- elife_poa_e55909_Transparent_Reporting_File.docx
- elife_poa_e55909_Figure_1_figure_supplement_1.pdf
- elife_poa_e55909_Figure_2_figure_supplement_1.pdf
- elife_poa_e55909_Figure_4_figure_supplement_1.pdf
- elife_poa_e55909_Figure_5_figure_supplement_1.pdf
