# Supplementary material for: Obesity causes selective and long-lasting desensitization of AgRP neurons to dietary fat
Source: eLife journal article supplement (doi:10.7554/elife.55909), 2020-07-27
Supplement: supp [file elife-55909-supp-v1.zip › elife_poa_e55909_Figure_1_figure_supplement_1.pdf]

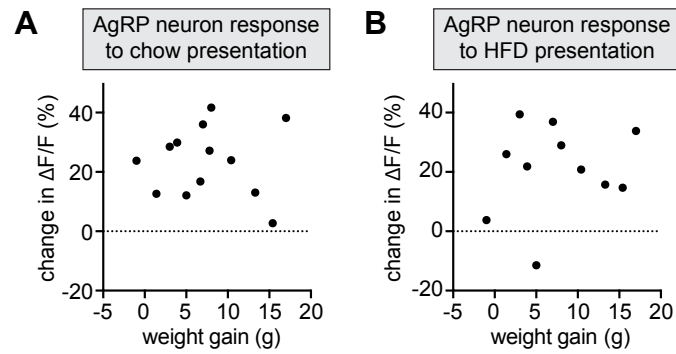

**Figure 1-figure supplement 1. Magnitude of DIO-induced changes in AgRP neuron dynamics are not correlated with amount of weight gain**  
**(A and B)** Change in  $\Delta F/F$  (response after 6 weeks HFD exposure minus response at baseline) in fasted DIO animals presented with chow (A) or HFD (B) plotted against the weight gain of individual animals.  
 (A)  $R^2 = 0.001$ ,  $p = 0.90$  ( $n = 13$  mice)  
 (B)  $R^2 = 0.028$ ,  $p = 0.62$  ( $n = 11$  mice)
