# Supplementary material for: Obesity causes selective and long-lasting desensitization of AgRP neurons to dietary fat
Source: eLife journal article supplement (doi:10.7554/elife.55909), 2020-07-27
Supplement: supp [file elife-55909-supp-v1.zip › elife_poa_e55909_Figure_2_figure_supplement_1.pdf]

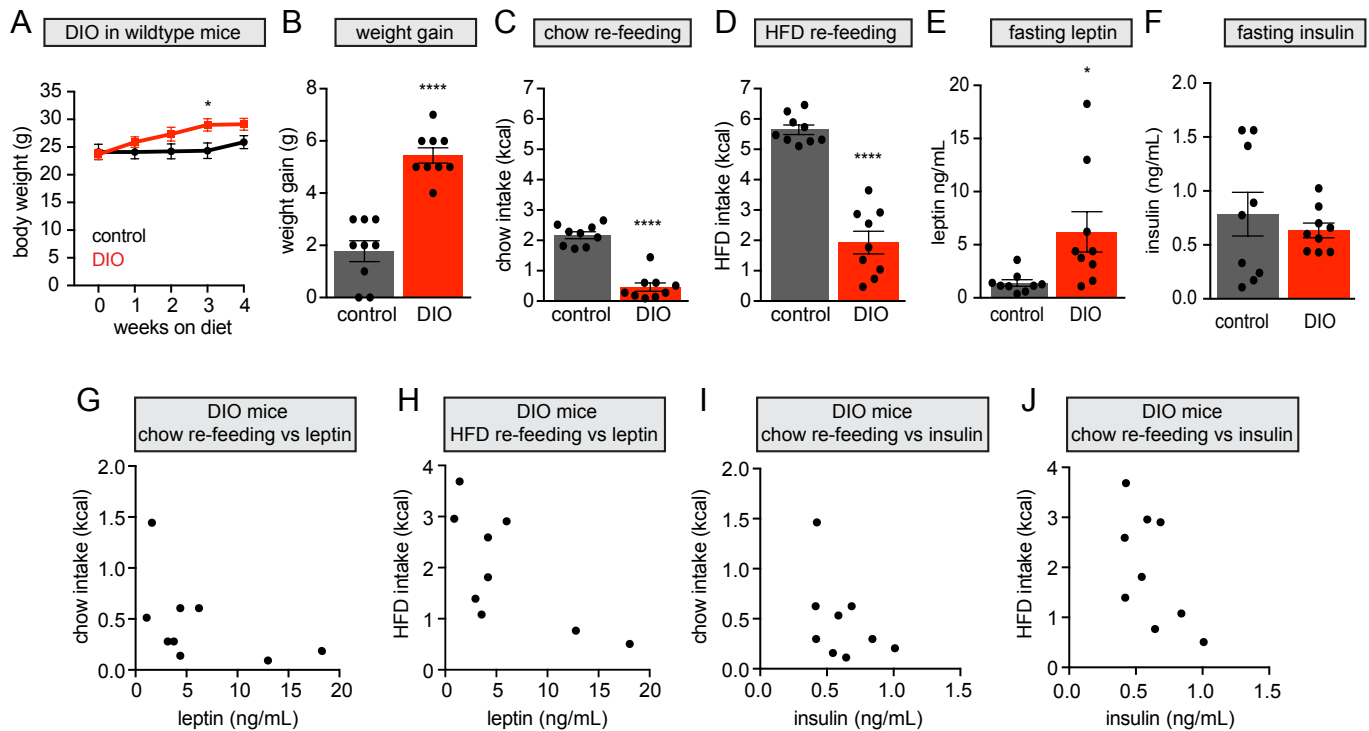

**Figure 2-figure supplement 1. Hyperleptinemia in diet-induced obesity correlates with suppression of fast re-feeding.**

**(A)** Body weight curves in DIO (red) and lean control (black) mice during 4 weeks of dietary intervention (n = 9 mice per group).

**(B)** Weight gain from baseline in mice from **(A)**.

**(C and D)** 30 minute chow **(C)** or HFD **(D)** re-feeding in overnight-fasted mice from **(A)** after 4 weeks of dietary intervention.

**(E and F)** Plasma leptin **(E)** and insulin **(F)** levels in overnight-fasted mice from **(A)** after 4 weeks of dietary intervention

**(G and H)** Chow **(G)** –  $R^2 = 0.237$ ,  $P = 0.18$  or HFD **(H)** –  $R^2 = 0.491$ ,  $P = 0.03$  re-feeding versus leptin levels in DIO mice following 4 weeks of HFD (n = 9 mice).

**(I and J)** Chow **(I)** –  $R^2 = 0.205$ ,  $P = 0.22$  or HFD **(J)** –  $R^2 = 0.368$ ,  $P = 0.08$  re-feeding versus insulin levels in DIO mice following 4 weeks of HFD (n = 9 mice).

\* $p < 0.05$  and \*\*\*\* $p < 0.0001$  in DIO mice compared to lean controls

Error bars represent mean  $\pm$  SEM.
