# Supplementary material for: Obesity causes selective and long-lasting desensitization of AgRP neurons to dietary fat
Source: eLife journal article supplement (doi:10.7554/elife.55909), 2020-07-27
Supplement: supp [file elife-55909-supp-v1.zip › elife_poa_e55909_Figure_4_figure_supplement_1.pdf]

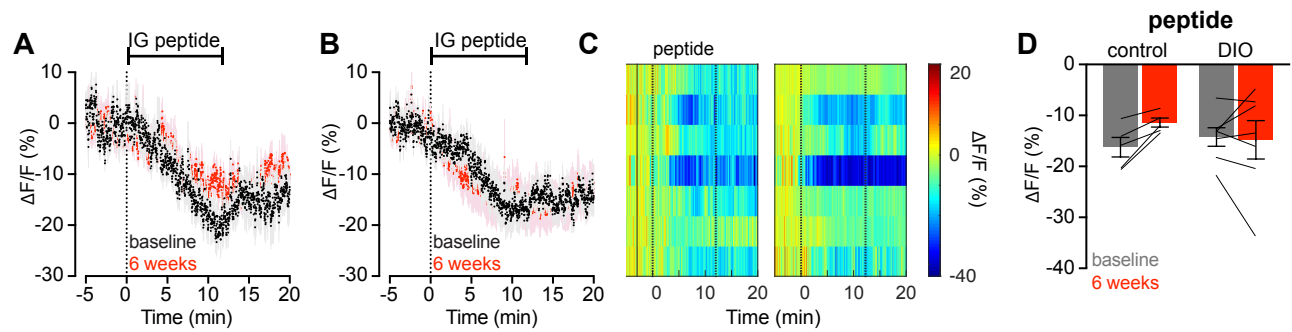

**Figure 4-figure supplement 1. Diet-induced obesity does not alter AgRP neuron response to intragastric infusion of peptides.**

**(A and B)** Calcium signal from AgRP neurons in fasted control (A) and DIO (B) mice during intragastric infusion with a peptide mixture at baseline (black) and after 6 weeks of chow or HFD (red). (n = 5-7 mice per group).

**(C)** Peri-infusion heatmaps depicting  $\Delta F/F$  during photometry recording in individual DIO mice (from B) at baseline (left) and after 6 weeks on HFD (right).

**(D)** Quantification of  $\Delta F/F$  from (A) and (B) showing inhibition at the end of infusion.

(A,B) Traces represent mean  $\pm$  SEM

(D) Lines denote individual mice. Error bars represent mean  $\pm$  SEM.
