# Supplementary material for: Obesity causes selective and long-lasting desensitization of AgRP neurons to dietary fat
Source: eLife journal article supplement (doi:10.7554/elife.55909), 2020-07-27
Supplement: supp [file elife-55909-supp-v1.zip › elife_poa_e55909_Figure_5_figure_supplement_1.pdf]

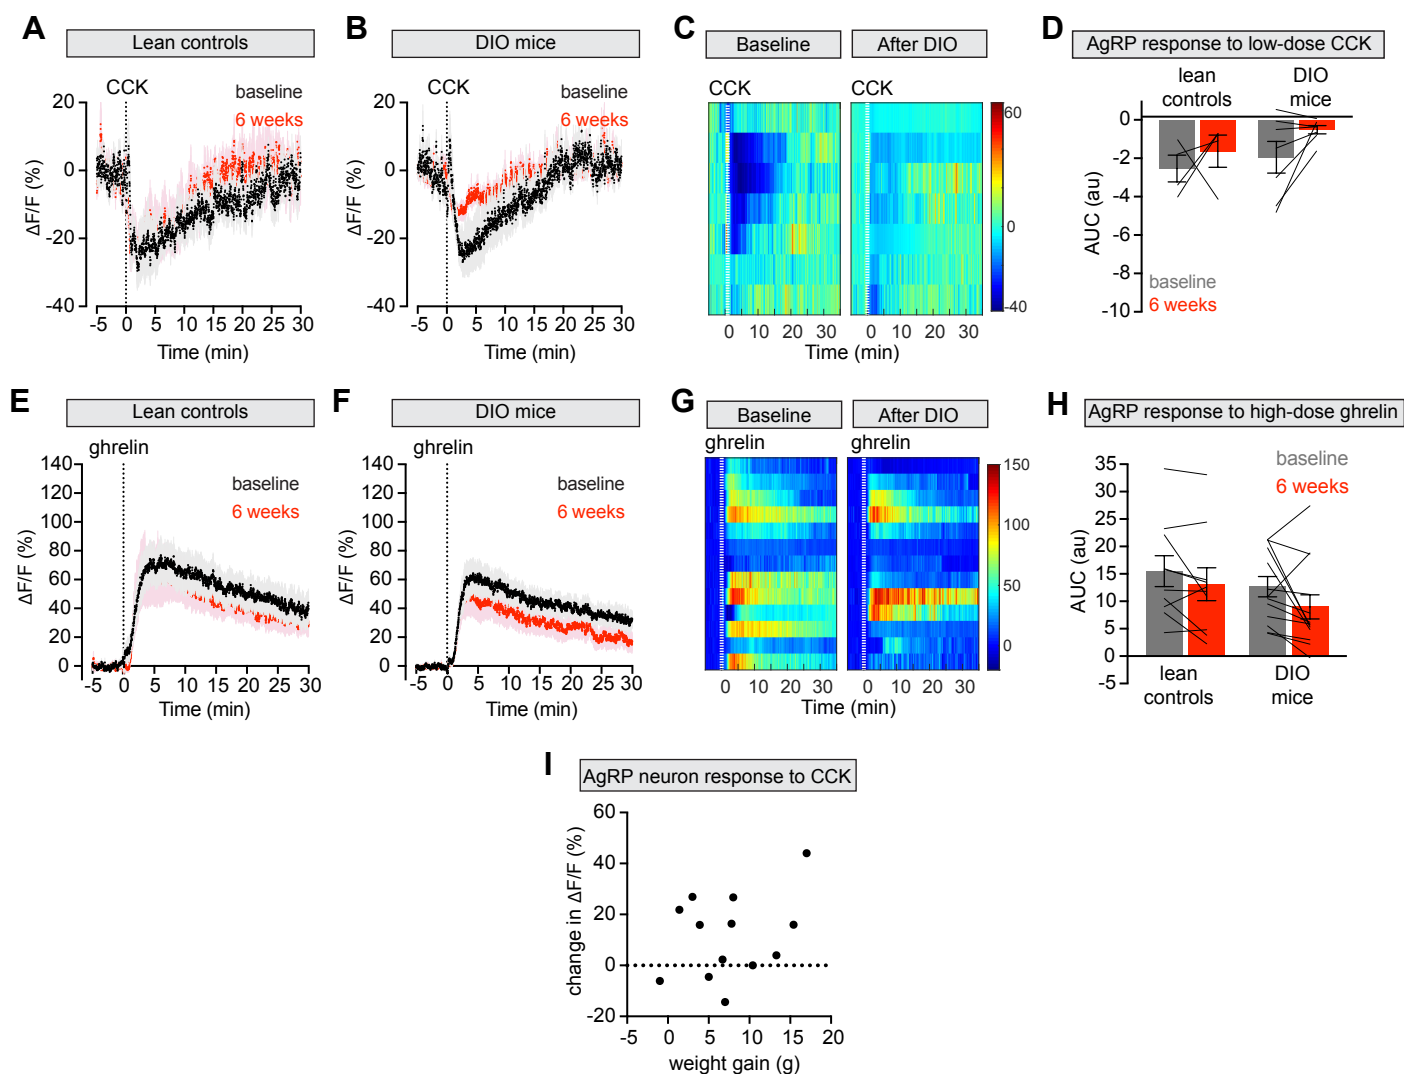

**Figure 5-figure supplement 1. The effect of DIO on AgRP neuronal responses to CCK and ghrelin is dose-dependent.**

**(A and B)** Calcium signal from AgRP neurons in fasted control (A) and DIO (B) mice treated with CCK 10  $\mu$ g/kg IP at baseline (black) and after 6 weeks on chow or HFD (red). (n = 4-7 mice per group).

**(C)** Peri-injection heatmaps depicting  $\Delta F/F$  during photometry recording in individual DIO mice from (B) at baseline (left) and after 6 weeks on HFD (right).

**(D)** Quantification of  $\Delta F/F$  from (A) and (B) showing area under the curve (AUC) for 20 min after injection.

**(E and F)** Calcium signal from AgRP neurons in ad libitum fed control (E) and DIO (F) mice treated with ghrelin 0.5 mg/kg IP at baseline (black) and after 6 weeks on chow or HFD (red). (n = 10-13 mice per group).

**(G)** Peri-injection heatmaps depicting  $\Delta F/F$  during photometry recording in individual DIO mice from (F) at baseline (left) and after 6 weeks on HFD (right).

**(H)** Quantification of  $\Delta F/F$  from (E) and (F) showing area under the curve (AUC) for 30 min after injection.

**(I)** Change in  $\Delta F/F$  (response after 6 weeks HFD exposure minus response at baseline) in fasted DIO animals treated with CCK plotted against the weight gain of individual animals.  $R^2 = 0.103$ ,  $p = 0.28$ . (n = 13 mice).

(A,B,E,F) Traces represent mean  $\pm$  SEM.

(D,H) Lines denote individual mice. Error bars represent mean  $\pm$  SEM.
